# Supplementary material for: Parental Evaluation of a Nurse Practitioner-Developed Pediatric Neurosurgery Website
Source: PubMed Central journal article supplement (PMC4846784; doi:10.2196/resprot.5156), 2016-04-12
Supplement: resprot_v5i2e55_app1.pdf [file resprot_v5i2e55_app1.pdf]

## Appendix 1 – Supplementary Figures

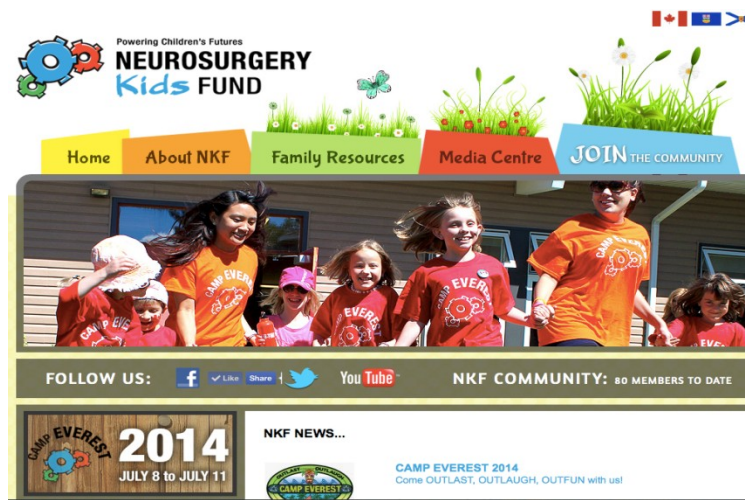

Figure S1. Homepage of the Neurosurgery Kids Fund website.

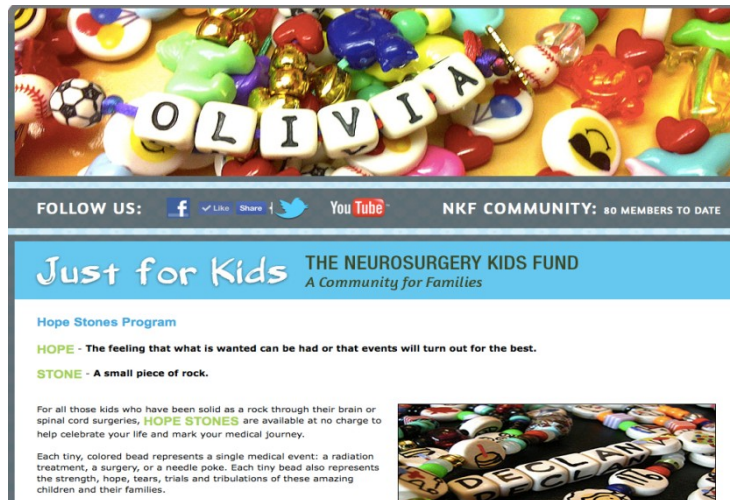

Figure S2: Screenshot about the Hope Stones, bead program.

**Family Resources** THE NEUROSURGERY KIDS FUND  
*We're here to answer your questions*

**MEDICAL CONDITIONS & DIAGNOSES**  
 Information on symptoms, diagnosis and treatment of common pediatric neurosurgical conditions. These are some of the most common neurosurgical conditions in the pediatric population. It is offered as a beginning resource in learning more about your child's medical condition.

**CLINIC & HOSPITAL INFORMATION**  
 Information for patients and families about preparing for their upcoming clinic or hospital visits. Tips and suggestions about your stay in hospital including parking information, food & beverages services, gift shops and general support are also provided.

**COMMUNITY RESOURCES**  
 Please take the time to read through the following topics because there is valuable information about the available funding and support services available to children and their families. This section was developed as a parent-to-parent advice and tips resource about how to get through all the "red tape" and paperwork.

**COPING & SUPPORT**  
 When parents receive life-changing news that their child may have medical issues or disabilities, the emotions can be overwhelming. Coping with your child's medical diagnosis and condition is unique and different for each person. The following is a beginning resource of information on coping and grieving.

**GREAT SITES & GOOD READS**  
 A list of websites which are a few of the very valuable resources for patients and families available on the internet. As with any online resource, use your judgment on the information online.

Figure S3: Screenshot of Family Resource page.

**CAMP EVEREST** 2014  
 JULY 8 to JULY 11

Home The Camp Register Location Schedule Media Gallery Need to Know Volunteer Form Contact

**REGISTER NOW**

**Who can Register for Camp Everest?**  
 Any child 7 to 17 years of age who has undergone brain or spinal cord surgery at the Stollery Children's Hospital at any point in their life is eligible for Camp Everest. Registration priority is given to campers who do not have a summer camp alternative. A



Figure S4: Screenshot of Camp Everest page.

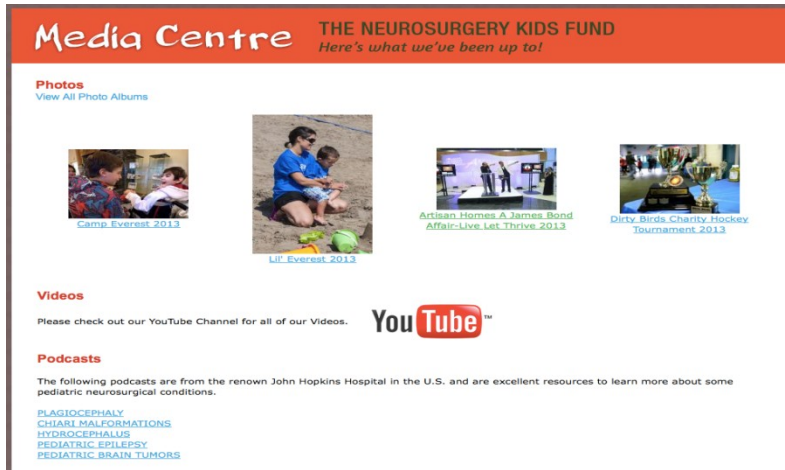

Figure S5: Screenshot of the Media Centre.

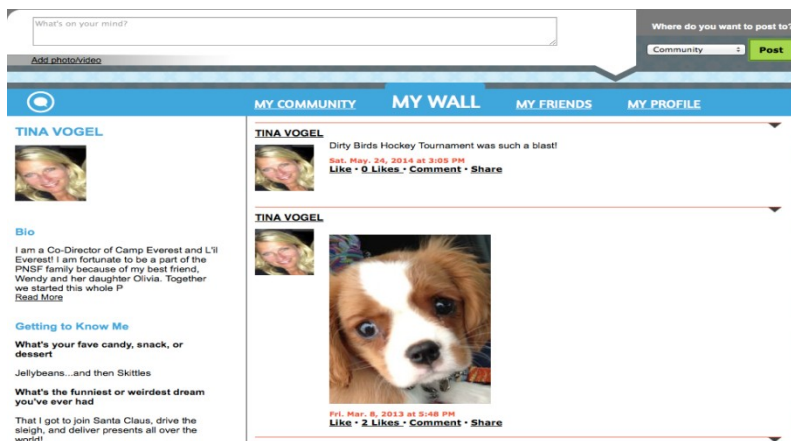

Figure S6: Screenshot of the Join the Community.
